# Supplementary material for: Structural and morphological studies of the dipeptide based l-Pro-l-Val organocatalytic gels and their rheological behaviour
Source: Royal Society of Chemistry journal article supplement (doi:10.1039/c2sm25647a), 2012-01-01
Supplement: c2sm25647a.pdf [file c2sm25647a.pdf]

*(Electronic Supplementary Information)*

**Structural studies of organocatalytic gels derived  
of L-Pro. Relationship between aggregation and  
supramolecular catalytic properties.**

*Francisco Rodríguez-Llansola, Beatriu Escuder, Juan Felipe Miravet, Ian*

*W. Hamley and Wayne Hayes.*

*Table S1* Minimum gel concentration (mM) for compounds **1a-c** and **2**

| Entry | Compound  | Toluene | CH <sub>3</sub> CN | CH <sub>3</sub> NO <sub>2</sub> | EtNO <sub>2</sub> | AcOEt | THF    | H <sub>2</sub> O | DME |
|-------|-----------|---------|--------------------|---------------------------------|-------------------|-------|--------|------------------|-----|
| 1     | <b>1a</b> | G (50)  | G (34)             | G (7)                           | G (29)            | G (6) | G (30) | ---              | 24  |
| 2     | <b>1b</b> | G (7)   | G (16)             | G (4)                           | G (20)            | G (7) | S      | ---              | S   |
| 3     | <b>1c</b> | G (11)  | G (14)             | G (3)                           | G (18)            | G (9) | S      | ---              | S   |
| 4     | <b>2</b>  | ---     | ---                | ---                             | ---               | ---   | ---    | G (2)            | --- |

G = Gel state; S = Soluble.

*Table S2* FTIR values for xerogels of compounds **1a-c** and **2**

| Entry | Compound  | Solvent                         | Amide A<br>(cm <sup>-1</sup> ) | Amide I<br>(cm <sup>-1</sup> ) | Amide II<br>(cm <sup>-1</sup> ) |
|-------|-----------|---------------------------------|--------------------------------|--------------------------------|---------------------------------|
| 1     | <b>1a</b> | CH <sub>3</sub> CN              | 3287                           | 1636                           | 1548                            |
| 2     | <b>1b</b> | CH <sub>3</sub> CN              | 3280                           | 1641                           | 1566-1540                       |
| 3     | <b>1c</b> | CH <sub>3</sub> CN              | 3281                           | 1636                           | 1559-1539                       |
| 4     | <b>1a</b> | CH <sub>3</sub> NO <sub>2</sub> | 3281                           | 1637                           | 1550                            |
| 5     | <b>1b</b> | CH <sub>3</sub> NO <sub>2</sub> | 3277                           | 1638                           | 1564-1540                       |
| 6     | <b>1c</b> | CH <sub>3</sub> NO <sub>2</sub> | 3292                           | 1636                           | 1552-1541                       |
| 7     | <b>2</b>  | CH <sub>3</sub> NO <sub>2</sub> | 3288                           | 1636                           | 1559-1539                       |
| 8     | <b>1a</b> | Toluene                         | 3280                           | 1636                           | 1546                            |
| 9     | <b>1b</b> | Toluene                         | 3281                           | 1641                           | 1540-1564                       |
| 10    | <b>1c</b> | Toluene                         | 3288                           | 1637                           | 1539-1559                       |
| 11    | <b>2</b>  | Water                           | 3283                           | 1638                           | 1550                            |

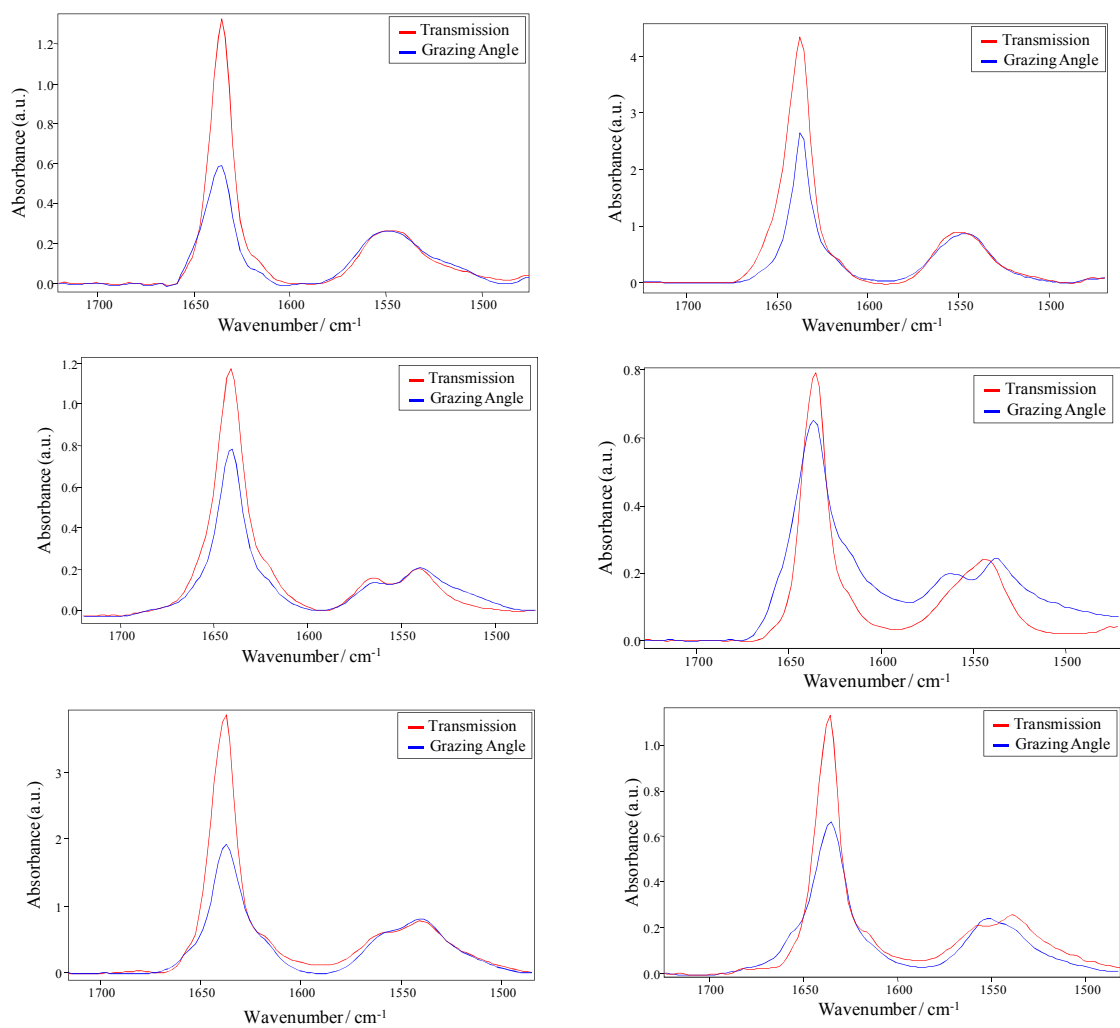

*Fig. S1* Transmission vs. grazing angle ATR FT-IR spectra for xerogels of compound **1a-c** in acetonitrile (left) and in nitromethane (right). Top: compound **1a**; Center: compound **1b**; Bottom: compound **1c**.

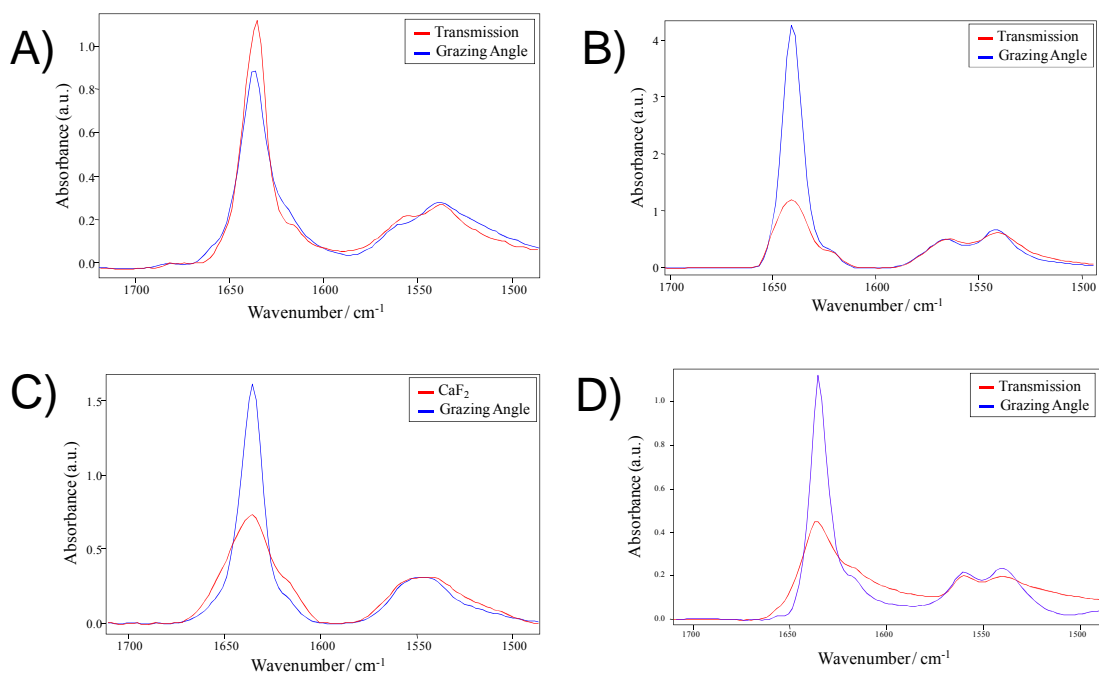

*Fig. S2* Transmission vs. grazing angle ATR FT-IR spectra for xerogels of compound **1a-c** in toluene (A-C) and for compound **2** in water (D).

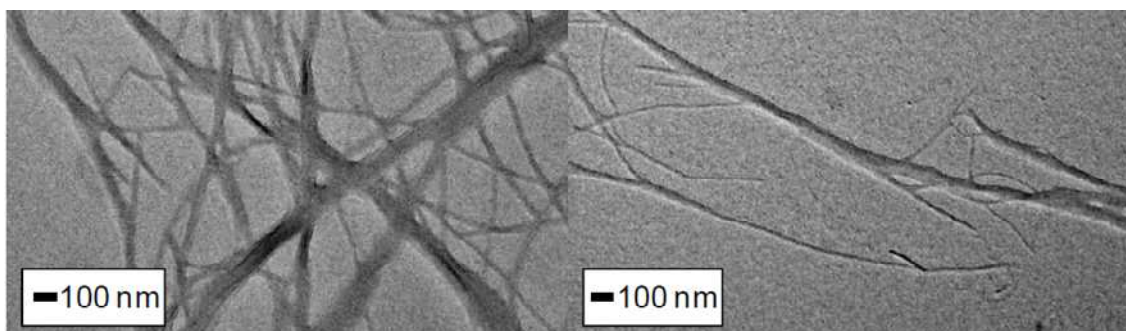

*Fig. S3* TEM photographs of a xerogel of compound **2**.

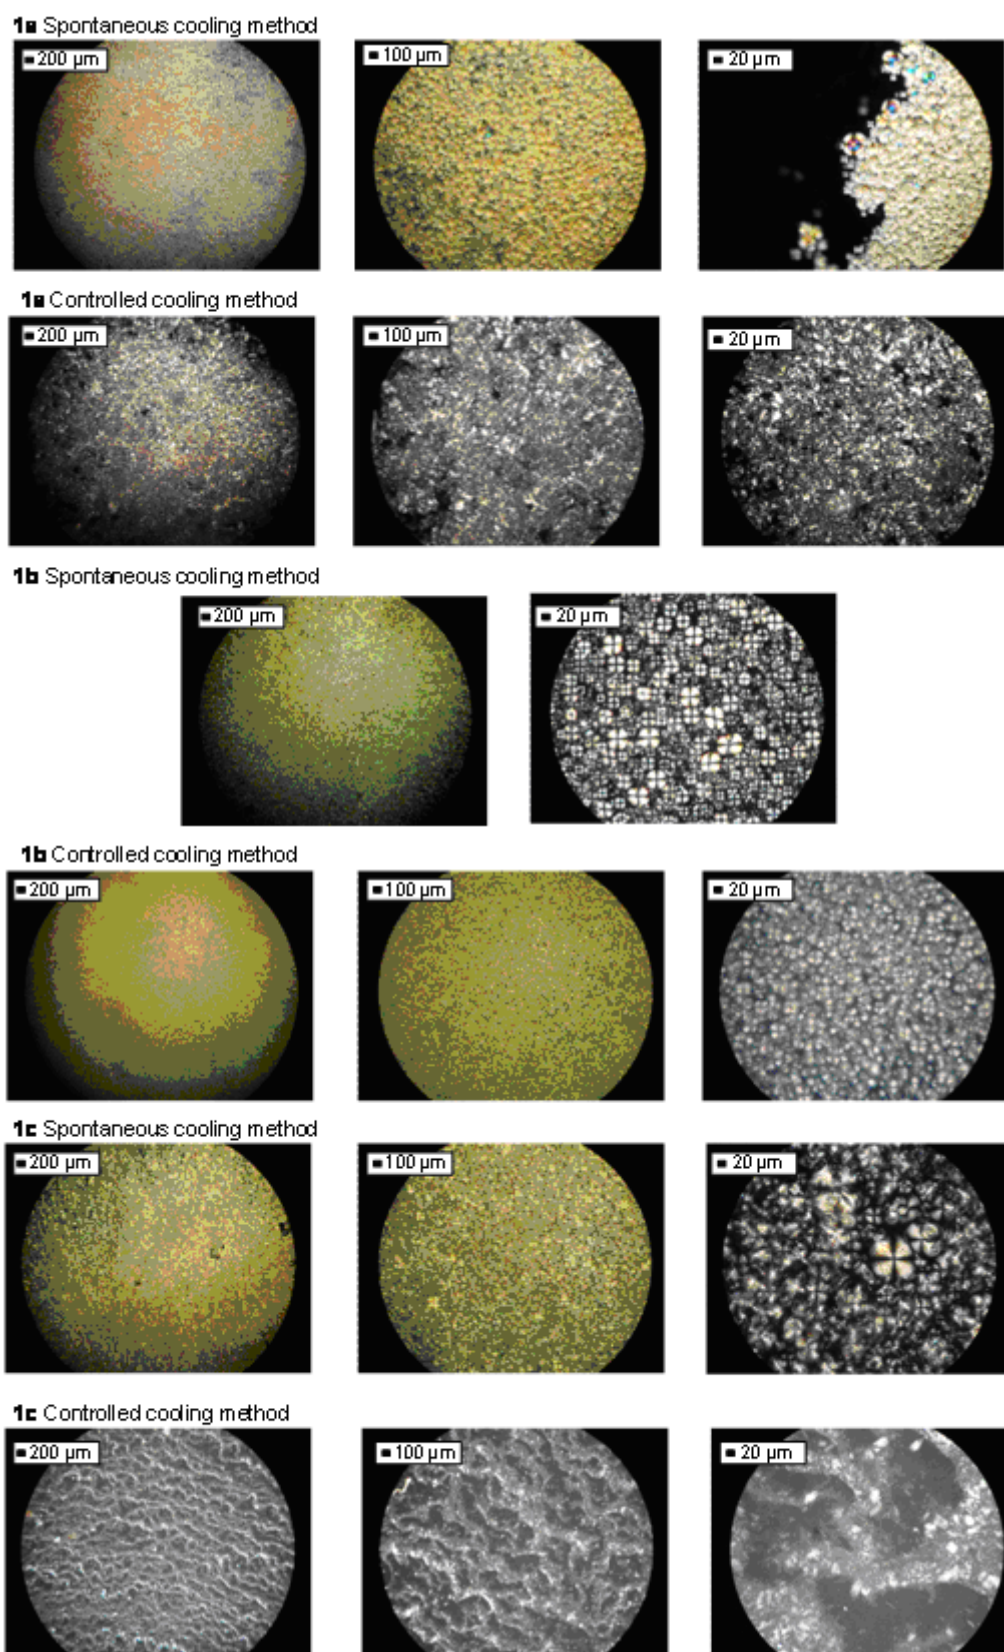

*Fig. S4* POM images of gels of **1a-c** in acetonitrile obtained by different gelation methods.

**1a** Nitromethane

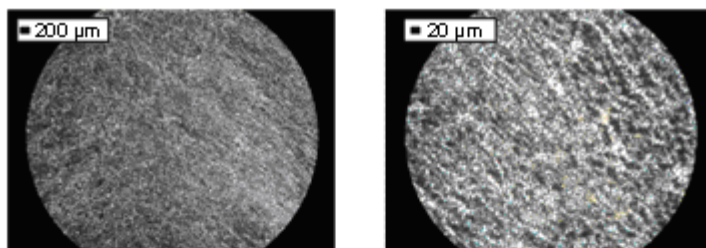

**1b** Nitromethane

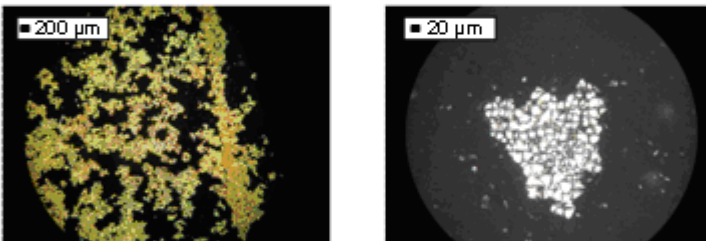

**1c** Nitromethane

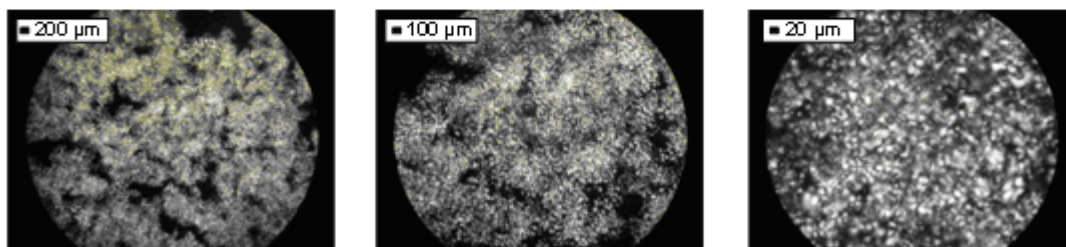

**1a** Nitroethane

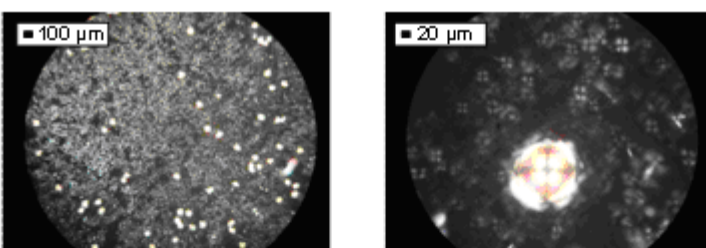

**1b** Nitroethane

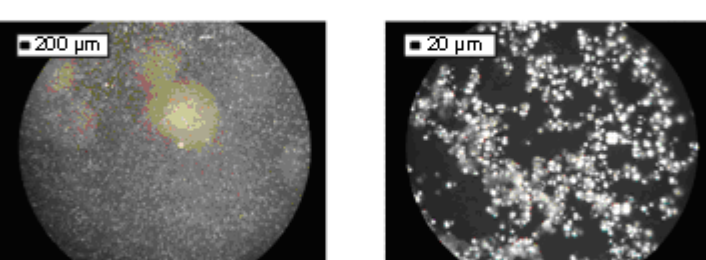

**1c** Nitroethane

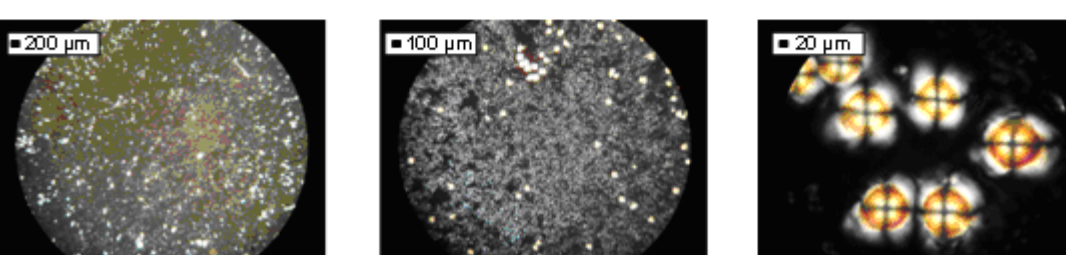

*Fig. S5* POM images of gels of **1a-c** in nitroalkanes.



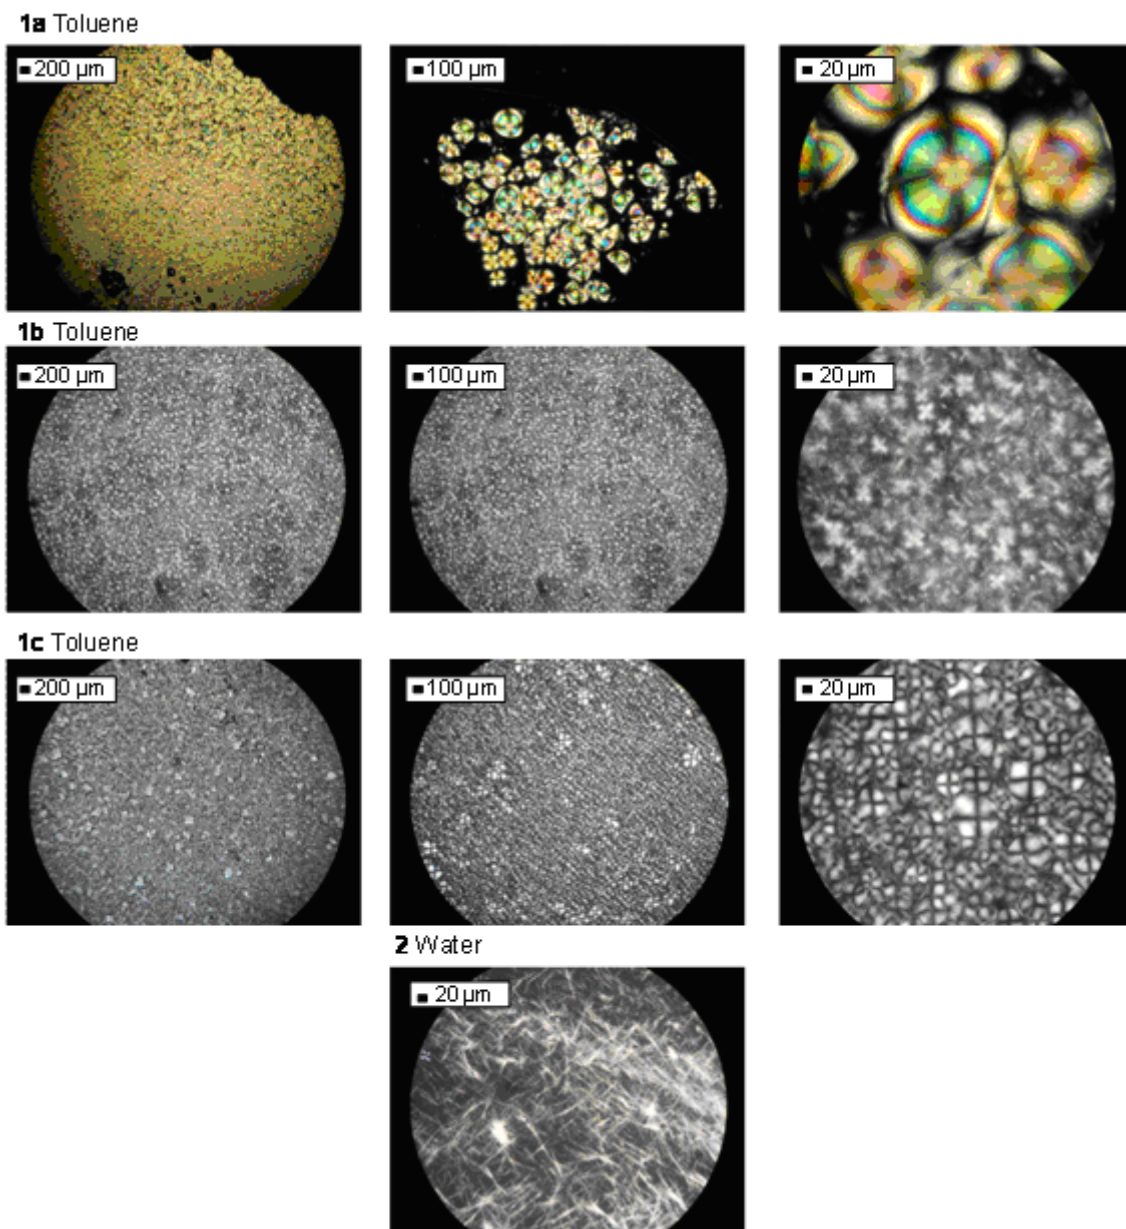

*Fig. S6* POM images of gels of **1a-c** in toluene and a gel of **2** in water.

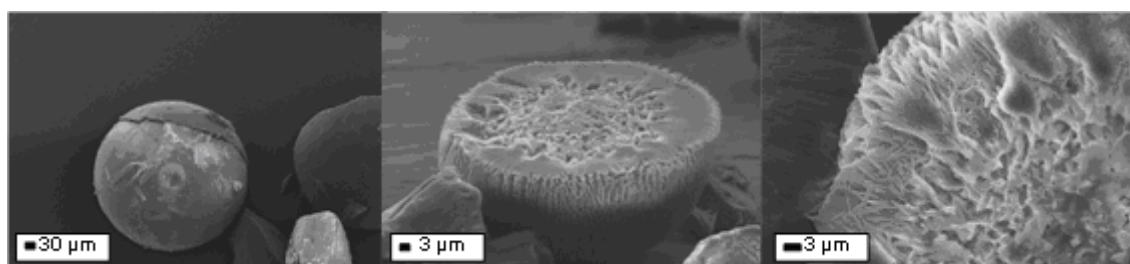

*Fig. S7* SEM images of spherulites detected in the gelation studies of **1c** in acetonitrile.

Fig. S8 Variation of the elastic modulus ( $G'$ ) and viscous modulus ( $G''$ ) vs the gelator

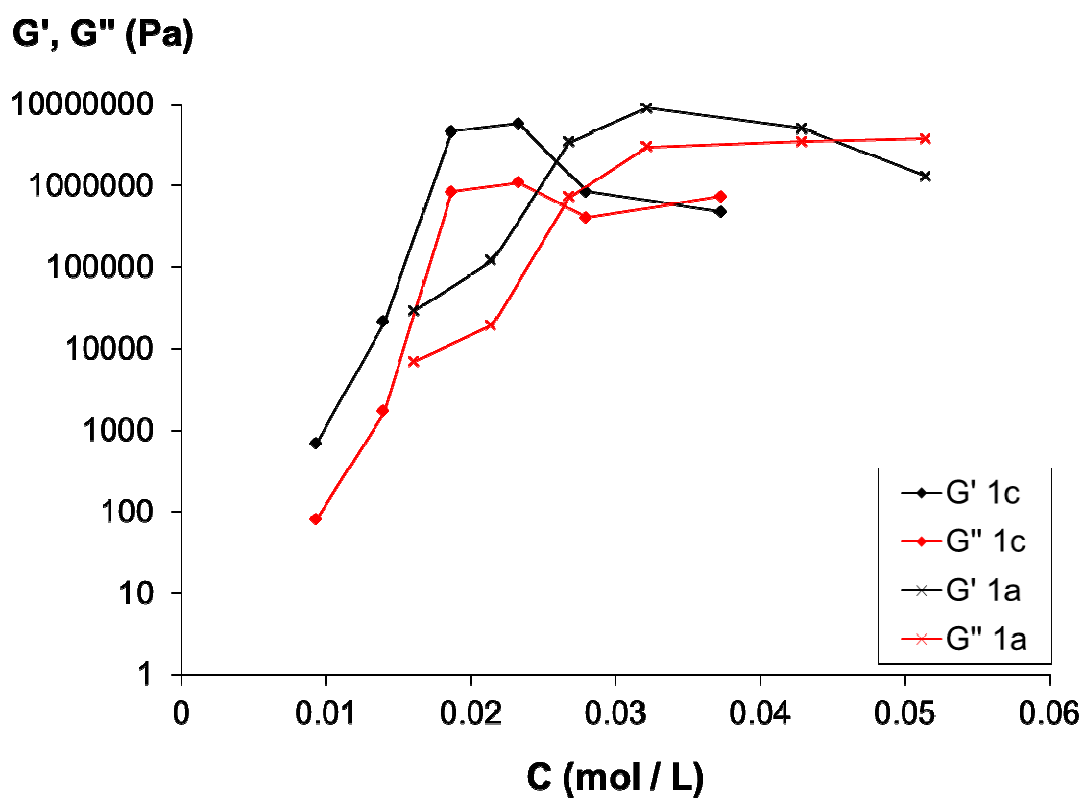

Fig. S9 Variation of the elastic modulus ( $G'$ ) and viscous modulus ( $G''$ ) vs the gelator concentration for gels **1a** and **1c** in nitromethane.
